## Scorecard to Predict Alzheimer's Disease

1

2 **The Cognitive, Age, Functioning, and Apolipoprotein E4 (CAFE) Scorecard to Predict the**

3 **Development of Alzheimer's Disease: A White-Box Approach**

4 Yumiko Wiranto<sup>a\*,+</sup>, Devin R Setiawan<sup>b+</sup>, Amber Watts<sup>a,c</sup>, Arian Ashourvan<sup>a</sup>, and for the

5 Alzheimer's Disease Neuroimaging Initiative<sup>1</sup>

6

7 <sup>a</sup>Department of Psychology, University of Kansas, Lawrence, Kansas, United States of America

8 <sup>b</sup>Department of Electrical Engineering and Computer Science, University of Kansas, Lawrence,

9 Kansas, United States of America

10 <sup>c</sup>University of Kansas, Alzheimer's Disease Research Center, Fairway, Kansas, United States of

11 America

12 <sup>1</sup>Data used in preparation of this article were obtained from the Alzheimer's Disease

13 Neuroimaging Initiative (ADNI) database ([adni.loni.usc.edu](http://adni.loni.usc.edu)). As such, the investigators within

14 the ADNI contributed to the design and implementation of ADNI and/or provided data but did

15 not participate in analysis or writing of this report.

16 <sup>+</sup> These authors contributed equally to this work.

17 \* Corresponding author

18 Yumiko Wiranto

19 Department of Psychology, University of Kansas, 1415 Jayhawk Boulevard, Lawrence, KS

20 66044

21 Email: [yumiko.wiranto@ku.edu](mailto:yumiko.wiranto@ku.edu)

22 Phone: +1 785-864-4131

## Scorecard to Predict Alzheimer's Disease

### 23 **Abstract**

24 Objective: This study aimed to bridge the gap between the costliness and complexity of  
25 diagnosing Alzheimer's disease by developing a scoring system with interpretable machine  
26 learning to predict the risk of Alzheimer's using obtainable variables to promote accessibility  
27 and early detection.

28 Participants and Methods: We analyzed 713 participants with normal cognition or mild cognitive  
29 impairment from the Alzheimer's Disease Neuroimaging Initiative. We integrated cognitive test  
30 scores from various domains, informant-reported daily functioning, *APOE* genotype, and  
31 demographics to generate the scorecards using the FasterRisk algorithm.

32 Results: Various combinations of 5 features were selected to generate ten scorecards with a test  
33 area under the curve ranging from 0.867 to 0.893. The best performance scorecard generated the  
34 following point assignments: age < 76 (-2 points); no *APOE*  $\epsilon 4$  alleles (-3 points); Rey Auditory  
35 Verbal Learning Test  $\leq$  36 items (4 points); Logical Memory delayed recall  $\leq$  3 items (5  
36 points); and Functional Assessment Questionnaire  $\leq$  2 (-5 points). The probable Alzheimer's  
37 development risk was 4.3% for a score of -10, 31.5% for a score of -3, 50% for a score of -1,  
38 76.3% for a score of 1, and greater than 95% for a score of > 6.

39 Conclusions: Our findings highlight the potential of these interpretable scorecards to predict the  
40 likelihood of developing Alzheimer's disease using obtainable information, allowing for  
41 applicability across diverse healthcare environments. While our initial scope centers on  
42 Alzheimer's disease, the foundation we have established paves the way for similar  
43 methodologies to be applied to other types of dementia.

44 Keywords: Alzheimer's disease; Machine learning; Cognition; Apolipoprotein  $\epsilon 4$

## Scorecard to Predict Alzheimer's Disease

### 45 **Introduction**

46 As the prevalence of Alzheimer's disease (AD) continues to rise, timely and accurate  
47 diagnosis becomes increasingly urgent. The diagnostic process for AD typically includes  
48 neurological evaluations, cognitive and functional assessments, brain imaging, cerebrospinal  
49 fluid analysis, and blood tests. However, this diagnostic approach presents challenges, such as  
50 high financial costs, invasiveness of some procedures, and limited accessibility, particularly in  
51 resource-limited or rural areas. Another significant barrier to timely diagnosis is the initial point  
52 of contact for many patients: their primary care physicians (PCPs). When individuals first notice  
53 memory-related issues, the first healthcare professional they typically go to is their PCP.  
54 However, many PCPs may not possess the specialized expertise required to identify the nuanced  
55 signs and symptoms of early AD or feel confident in delivering a conclusive diagnosis.<sup>1, 2</sup> As a  
56 result, patients might experience delays in obtaining appropriate care, or, in some cases, may not  
57 be referred for further evaluation at all. Therefore, the solution lies in bridging this diagnostic  
58 gap at the primary care level by developing an easily administered and interpretable method to  
59 screen for AD risk.

60 The advancement of machine learning models offers a vast avenue for aiding the  
61 diagnostic process due to their speed, consistency, and data-driven decisions that often excel in  
62 comparison to humans.<sup>3</sup> Recent efforts to develop machine learning models to assist clinicians in  
63 identifying early-stage AD, such as Convolutional Neural Networks (CNN) and Gradient  
64 Boosting Machines (GBM), have demonstrated robust accuracy.<sup>4,5</sup> However, the use of these  
65 models has raised important issues pertaining to interpretability. To further elucidate this point, a  
66 CNN is a type of neural network that uses image data and employs convolution layers (i.e.,  
67 scanning a group of pixels) and pooling layers (i.e., size reduction) to process the image

## Scorecard to Predict Alzheimer's Disease

68 efficiently for image classification tasks.<sup>6</sup> Meanwhile, A GBM is a type of machine learning  
69 algorithm that combines multiple simple models, typically decision trees, where each new tree  
70 aims to correct the errors made by the previous ones to create a powerful predictive model.<sup>7</sup>  
71 While CNNs and GBMs allow for accurate image categorization and model prediction,  
72 respectively, the complexity of these methods creates a "black box" effect where it becomes  
73 difficult to understand how a particular decision is made, potentially leading to a lack of trust in  
74 the outputs from clinicians.

75         Interpretable machine learning models (i.e., white-box approach), on the other hand, do  
76 not suffer from the same issues. Interpretable models aim to provide the “why” of outputs,  
77 offering insights into how specific features contribute to predictions and allowing for transparent  
78 and understandable decision-making processes. This transparency promotes human-computer  
79 interaction, in the case of clinical settings, trust between clinicians and the machine learning  
80 outputs.<sup>8</sup> Previous research has yielded reasonable accuracy in predicting the risk of a medical  
81 condition, such as epileptic seizure, using such an approach.<sup>9</sup>

82         In this study, we developed risk scores that were presented in a scorecard model to assess  
83 the risk of developing AD. Risk scores are predictive models that have been used in various  
84 fields, including medicine, to aid decision-making processes through basic mathematical  
85 calculation.<sup>10-12</sup> We selected the following variables to develop the scorecards due to their  
86 accessibility and comprehensive representation of factors influencing AD: demographic  
87 information, cognitive tests from various domains, daily functioning, and the apolipoprotein  $\epsilon 4$   
88 allele (*APOE4*). Although these variables are well-known for their contribution to AD  
89 development, many PCPs are unsure about the appropriate timing or severity level to seek  
90 further interventions. Therefore, we designed the scorecards to inform clinicians of the probable

## Scorecard to Predict Alzheimer's Disease

91 risk of developing AD based on a patient's presentation. This could help clinicians decide when  
92 to refer patients to specialists or initiate interventions.

93 The scorecards in this study were constructed using the FasterRisk algorithm, a recent  
94 advancement that significantly improves the creation of high-quality risk scores.<sup>13</sup> Traditional  
95 methods, such as rounding logistic regression coefficients or non-data-driven approaches, often  
96 result in suboptimal risk scores that either fail to accurately capture the data's complexity or  
97 require extensive computational resources. The FasterRisk algorithm is not only  
98 computationally efficient, completing within minutes, but also provides multiple high-quality  
99 risk scores for consideration, enhancing the robustness of the model.<sup>13</sup> This transparency and  
100 efficiency make FasterRisk an ideal choice for developing interpretable models that clinicians  
101 can trust and easily use in primary care settings to improve the timely diagnosis of AD. We  
102 predicted that our framework could generate a scoring system with robust predictive power using  
103 accessible variables.

## 104 **Materials and methods**

### 105 **Participants**

106 We included data from 713 baseline visits from all the Alzheimer's Disease  
107 Neuroimaging Initiative cohorts (ADNI 1, 2, GO, and 3) as of August 2023. ADNI is a multi-site  
108 study that has collected clinical, biomarker, genetic, and neuroimaging data in the U.S. and  
109 Canada since 2004. ADNI's broader criteria include age 55-90, a minimum of 6 years of  
110 education, consistent medication for the past 4 weeks, Hachinski scale < 4 (to rule out vascular  
111 dementia), and Geriatric Depression Scale < 6; more information can be found [www.adni-](http://www.adni-info.org)  
112 [info.org](http://www.adni-info.org). We included participants in our analyses who were classified by ADNI as having  
113 normal cognition (NC) or amnesic Mild Cognitive Impairment (aMCI). Participants classified as

## Scorecard to Predict Alzheimer's Disease

114 NC were those with no subjective memory complaints, Mini-Mental State Exam (MMSE) scores  
115 of 24-30, Clinical Dementia Rating (CDR) of 0, and a within-normal score on the Wechsler  
116 Memory Scale Logical Memory II during screening. aMCI participants were those with  
117 subjective memory complaints, objective memory deficits indicated by neuropsychological tests,  
118 and a CDR score of 0.5. A request to access the ADNI dataset was approved for this study.  
119 Informed consent was obtained from all participants at the time of study enrollment.

120 For the present analyses, participants were divided into two groups: stable and  
121 progressive. The stable group consisted of individuals who remained at the same diagnosis level  
122 over time. The progressive group included those who developed AD. Specifically, participants  
123 who progressed from aMCI to AD were placed in the aMCI-AD group. Those who went from  
124 NC to aMCI and then to AD were placed in the NC-AD group. Individuals who progressed to  
125 aMCI from NC were not included in the analysis.

### 126 **APOE Genotyping**

127 APOE genotyping was performed on DNA samples obtained from subjects' blood, using  
128 an APOE genotyping kit, as described in  
129 <http://www.adniinfo.org/Scientists/Pdfs/adniproceduresmanual12.pdf> (also see [http://www.adni-](http://www.adniinfo.org)  
130 [info.org](http://www.adniinfo.org) for detailed information blood sample collection, DNA preparation, and genotyping  
131 methods). *APOE*  $\epsilon 4$  carriers were defined as participants with one or two copies of the *APOE*  $\epsilon 4$   
132 allele.

### 133 **Neuropsychological Tests and Functioning**

134 We selected a range of neuropsychological tests that tapped into a variety of cognitive  
135 domains, such as attention, executive function, memory (short-term and long-term), verbal  
136 fluency, and global cognition. The selected tests were the Mini-Mental State Examination

## Scorecard to Predict Alzheimer's Disease

137 (MMSE), Rey Auditory Verbal Learning Task (RAVLT) learning and immediate, Logical  
138 Memory delayed (LDEL), Category Animal (CATANIMSC), Trail Making Test A (TMT A),  
139 and Trail Making Test B (TMT B). These tests were selected because they were administered  
140 across all ADNI cohorts. Additionally, we included the informant-reported instrumental  
141 activities of daily living measured with the Functional Activities Questionnaire (FAQ).

### 142 **Data Preprocessing**

143 The final dataset encompasses a comprehensive set of features that play a crucial role in  
144 understanding the factors associated with the progression of the condition under investigation.  
145 The final set of features that we selected for training the FasterRisk machine learning model are  
146 age, sex, education, *APOE ε4* carrier status, MMSE, RAVLT immediate, RAVLT learning,  
147 LDEL, CATANIMSC, TMT A, TMT B, and FAQ. These features represent a combination of  
148 demographic information, cognitive assessments, informant-reported daily functioning, and a  
149 genetic marker of AD.

150 To prepare the data for analysis, we converted categorical variables into numerical  
151 representations through Scikit-learn Labelencoder. For 'diagnosis,' -1 represents a sample  
152 belonging to the stable group, and 1 represents an unstable group sample. For 'PTGENDER,' 0  
153 represents female, and 1 represents male. Participants ( $n = 15$ ; 2.03%) with invalid or missing  
154 values were identified and removed from the dataset. The dataset was further filtered based on  
155 the following conversion rate statistics. To be included in the stable group, the sample had to  
156 contain data indicating this diagnosis for at least 3 years to be classified as aMCI and 5 years for  
157 NC to account for the conversion rate.<sup>14,15</sup> This decision was based on previous studies and to  
158 exclude those who converted from normal to aMCI shortly after the initial visit. The next  
159 preprocessing step was applying binarization using the FasterRisk build-in binarization module

## Scorecard to Predict Alzheimer's Disease

160 to convert the features from continuous into binary features (Figure 1). This ensures the proper  
161 input data format for the algorithm. All computations were performed on Python version 3.11.9  
162 and data preprocessing was done using Numpy 1.23.5.

### 163 **FasterRisk Algorithm**

164 The FasterRisk algorithm aims to find high-quality risk scores, which have been the most  
165 popular form of the predictive model used in high-stakes decision-making.<sup>13</sup> It provides an  
166 interpretable set of scores that are easily understood, making each decision easier to explain. This  
167 is achieved through a three-step framework: a beam-search-based algorithm for logistic  
168 regression with bounded coefficients (for Step 1), the search algorithm to find pools of diverse,  
169 high-quality continuous solutions (for Step 2), the star ray search technique using multipliers  
170 (Step 3), and a theorem guaranteeing the quality of the star ray search.

171 The FasterRisk algorithm has a parameter 'k' called sparsity, which refers to the number  
172 of features with non-zero coefficients. In other words, 'k' controls the number of features in the  
173 final scorecard. The beam-search algorithm in FasterRisk operates under the assumption that one  
174 of the best models of size k implicitly contains variables from one of the best models of size k-1.  
175 It begins by selecting the best feature, constrained to a small coefficient box (e.g., [-5, 5]). Then,  
176 it iteratively adds another feature to this set, gradually building up the model. This approach  
177 allows the algorithm to focus on the most promising features without searching the entire space  
178 of possible combinations. The search algorithm in step 2 defines a tolerance gap level and  
179 generates many solutions by replacing one feature with another without affecting its performance  
180 more than the defined tolerance gap. The star ray search extends the coefficients by multiplying  
181 them to find a solution closer to an integer. This model was chosen due to its quality of solutions



## Scorecard to Predict Alzheimer's Disease

182 and speed, which is significantly better than RiskSlim, a previous state-of-the-art model for  
183 finding risk scores.<sup>16</sup>

### 184 **Selecting Optimal Sparsity**

185 To select the optimal sparsity, a stratified 5-fold cross-validation is employed to find the  
186 best k-value that satisfies a given criterion (Figure 1). A range of k-values is selected, and the  
187 criteria is given to the cross-validation algorithm. The selected k-value range is 1-10, with AUC  
188 as the selection criteria. The cross-validation algorithm works by calculating the mean  
189 performance of the top 10 models for each fold and then averaging those means over the folds.  
190 This is done with all the k-values in the range, giving an estimated performance for each sparsity  
191 selection. The k-value that has the highest performance is selected as the optimal sparsity.

### 192 **Evaluation Metrics**

193 After finding the optimal sparsity value, the model is trained with the whole training set,  
194 which encompasses 80% of the data, and performance is evaluated on a test set encompassing  
195 the 20% that was left out during the training process (Figure 1). Ten optimal models were  
196 generated, along with their accuracy and area under the curve (AUC) performance on the test set.  
197 The decision to generate ten models stemmed from the need to explore a diverse range of "good"  
198 models, enabling researchers to delve into the interpretable features extracted from the ten  
199 scorecards created. While it is feasible to generate more models, ten was chosen as it allows for  
200 capturing all features present in the scorecards. Higher model counts do not significantly differ in  
201 features but can consume additional resources without commensurate benefits, thus our approach  
202 values parsimony. Importantly, the algorithm often generates different numbers of models to  
203 choose from, but we can always guarantee that 10 models will be generated and available for us  
204 at any given iteration of the experiment. A set of features and their bounds were generated and

## Scorecard to Predict Alzheimer's Disease

205 the corresponding points to the right of it. The point is assigned when the criteria for the feature  
206 and its bounds are met. The points would then be added to obtain the final score. The score can  
207 be mapped to a percentage risk using the score-to-risk table generated by the algorithm. The  
208 accuracy metrics were calculated by assigning negative predictions whenever the risk is below  
209 50% and assigning positive predictions whenever the risk is above 50%. The AUCs were  
210 calculated from the area of the Receiver Operating Characteristic curve (ROC curve), which  
211 represents the ability of the model to distinguish between different classes in a binary  
212 classification problem.

### 213 **Comparison Against Baseline Models**

214 We constructed multiple baseline models using common machine learning algorithms to  
215 compare the performance of our scorecard model. The baseline models are built utilizing  
216 Logistic Regression, Support Vector Classifier (SVC), and Random Forest Classifier,  
217 incorporating all available features from the dataset. These models were chosen to capture  
218 different modeling approaches to account for variation in performances across algorithms, giving  
219 us a broad range of performance values. Evaluation of these models is conducted through a 5-  
220 fold cross-validation approach, similar to how we evaluate our interpretable model to ensure fair  
221 comparison. The performance of the baseline models is assessed using the same AUC evaluation  
222 metrics employed for the interpretable model, thereby maintaining consistency across the  
223 evaluation process.

## 224 **Results**

### 225 **Participant Characteristics**

226 We included data from 713 participants, 200 with NC and 513 with aMCI at ADNI  
227 baseline visit. Over time, 11.5% of the former group and 54.8% of the latter group were

## Scorecard to Predict Alzheimer's Disease

228 diagnosed with AD. The overall participant characteristics at baseline were as follows: 44.6%  
229 were female, the average age of 73.4 years, the average educational level was 16.1 years, and  
230 53.9% did not carry the *APOE4* gene (Table 1). The average transition for the aMCI-AD and the  
231 NC-AD groups are 2.5 and 7.2 years, respectively.

### 232 **Differences in Functioning and Cognitive Performance at Baseline Based on Diagnostic** 233 **Group**

234 Using t-tests, we observed that the NC-AD group exhibited poorer performance in the  
235 TMT A than those whose condition remained stable (“stable normal”), as indicated in Table 1 ( $p$   
236  $< 0.05$ ). A higher score on the TMT A indicates a longer time to complete the test, which is  
237 indicative of worse performance. When comparing stable aMCI and aMCI-AD, we found that  
238 the aMCI-AD group had significantly lower performance across all cognitive tests included in  
239 the model ( $p < 0.001$ ). In terms of functioning level measured by the FAQ, those who eventually  
240 progressed to AD showed a higher level of impairment at baseline in relation to their stable  
241 counterparts ( $p < 0.01$ ).

### 242 **Alzheimer Prediction Risk Score**

243 Based on the FasterRisk algorithm, a sparsity level of 5 was selected for the most optimal  
244 combination for the generation of the final scorecards to predict AD development. Ten  
245 scorecards were generated with a test AUC range of 0.867 to 0.893. The scorecard with the  
246 highest test AUC (0.893) shown in Table 2 represents age equal to or less than 76.3 (-2 points);  
247 absence of an *APOE ε4* allele (-3 points); RAVLT immediate of 36 or less (4 points); LDEL of 3  
248 or less (5 points); and FAQ of 2 or less (-5 points). Positive points indicate an elevated risk of  
249 AD, while negative points suggest a reduced risk. The probable AD development risk was 4.3%  
250 for a total score of -10, 12.5% for a score of -7, 31.5% for a score of -3, 50% for a score of -1,

## Scorecard to Predict Alzheimer's Disease

251 76.3% for a score of 1, 87.5% for a score of 3, and greater than 95% for a score of 6, 7, or 9  
252 (Table 2). In sum, younger age, absence of *APOE*  $\epsilon 4$  alleles, higher cognitive performance, and  
253 better daily functioning contributed to reduced AD risk. Other variations of the scorecard can be  
254 found in the Supplementary Figure 1.

### 255 **Base Model Comparison**

256 We compared our custom scorecard model with three common machine learning  
257 methods: Logistic Regression, Support Vector Classifier (SVC), and Random Forest Classifier.  
258 The Logistic Regression and SVC had an AUC score of 0.88, while the Random Forest  
259 Classifier had an AUC score of 0.89. These scores demonstrated how well these methods  
260 perform using all available features. Our scorecard model, however, only used five key features  
261 and still did well, with an AUC score of 0.872 and a range of 0.867 to 0.893. Despite the slight  
262 reduction in average AUC to 0.87 when compared to the base ML models, it is important to  
263 highlight the tradeoff made for interpretability and parsimony by utilizing only five features in  
264 our scorecard model. This compromise highlights the significance of our approach, where  
265 maintaining high predictive performance while having a sparse feature set demonstrates the  
266 model's effectiveness and practical applicability in real-world scenarios.

### 267 **Discussion**

268 Our study presents a novel approach to predicting the risk of developing AD that offers  
269 promising potential to be applied in clinical settings or in primary care by employing a set of  
270 obtainable variables, including demographics, *APOE*  $\epsilon 4$  status, informant-reported daily  
271 functioning, and cognitive performance scores. By utilizing the FasterRisk algorithm, we  
272 generated ten scorecards, each demonstrating high predictive accuracy with AUC scores ranging  
273 from 0.867 to 0.893. This range indicates a strong balance between sensitivity and specificity in

## Scorecard to Predict Alzheimer's Disease

274 identifying individuals at risk of developing AD. All scorecards consistently included variables  
275 such as *APOE ε4*, daily functioning, and memory-related tests, suggesting the significance of  
276 these variables in determining progression to AD. These findings are consistent with existing  
277 knowledge in the literature on AD.<sup>17-19</sup> Age appeared as a significant predictor in six of the  
278 scorecards, while executive function (TMT B) and verbal fluency (CATANIMSC) were  
279 highlighted in fewer scorecards, reflecting the cognitive diversity observed in AD. These  
280 findings suggest that including executive function and verbal fluency in the scorecards could  
281 potentially capture cognitive decline in those who may have a slightly different presentation,  
282 highlighting the heterogeneity of AD.<sup>20</sup>

283 Furthermore, a notable observation from our study is that none of the scorecards  
284 identified TMT A, RAVLT learning, and Mini-Mental State Examination (MMSE) as reliable  
285 predictors for the development of AD. These findings could imply that cognitive domains related  
286 to attention and learning ability may not be significantly affected in the early stages of cognitive  
287 decline and that memory is the first domain to decline in individuals who later develop AD.<sup>21</sup>  
288 While MMSE is widely used in clinical practice for diagnosing dementia, its utility in predicting  
289 progression to AD may be limited. The MMSE primarily assesses global cognitive function and  
290 may lack the sensitivity to detect subtle cognitive changes that precede the onset of AD.<sup>22,23</sup>

291 In comparison to established models for AD diagnosis, our developed scorecard has  
292 exhibited promising performance. Fraser et al. demonstrated an accuracy of 82% utilizing only  
293 neuropsychological (NPS) variables with a larger dataset comprising 167 AD samples and 97  
294 healthy controls.<sup>24</sup> When examining MCI discrimination, our scorecard, with an accuracy of  
295 80.4% and an AUC of 0.893, remains competitive. Notably, it compares favorably with Ye et  
296 al.'s logistic regression model, which achieved AUCs of 0.77 using only NPS, 0.81 using NPS

## Scorecard to Predict Alzheimer's Disease

297 and biological data, and 0.86 using NPS, biological, and imaging data, in the context of 142 MCI  
298 converters and 177 MCI non-converters.<sup>25</sup> Lastly, our scorecard has a better AUC compared to  
299 an interpretable model from an existing study that achieved an AUC of 0.86.<sup>26</sup> While  
300 acknowledging the nuanced differences in sample sizes, features, and methodologies across  
301 studies, our findings suggest the potential utility and efficacy of our scorecard in contributing to  
302 the field of AD diagnosis.

303         Despite not attaining the highest AUC in comparison to baseline models, a notable  
304 advantage of our scorecard lies in its interpretability. While some high-performing models may  
305 exhibit superior discrimination metrics, their complexity often renders them opaque in terms of  
306 feature contributions. In contrast, our scorecard's interpretability provides clinicians with a clear  
307 explanation of the specific neuropsychological and biological features influencing its predictions.  
308 This transparency promotes human-computer interaction, in this case, trust between clinicians  
309 and the machine learning outputs.<sup>8</sup> Furthermore, these scorecards offer flexibility in their  
310 implementation, which allows clinicians to incorporate their knowledge of expertise into the  
311 scorecards when predicting the risk of AD development. For example, in our scorecard (Figure  
312 1), being younger than 76 years old would decrease the total points by 2. However, a 75-year-old  
313 patient is not significantly younger than 76 years old. In this case, the clinician can incorporate  
314 their judgement and assign a 0 to the age feature, indicating that being 75 years old does not  
315 decrease the risk of AD development. The balance between performance, interpretability, and  
316 flexibility positions our scorecard as a promising tool for practical clinical application, where  
317 understanding the rationale behind predictions is paramount for effective and informed decision  
318 support.

## Scorecard to Predict Alzheimer's Disease

319           There are some limitations in our study. The scorecards generated in this study are only  
320 applicable to one type of dementia – Alzheimer's. Future work incorporating individuals who  
321 develop other types of dementia may result in different results or patterns of the scorecards. For  
322 example, a scorecard consisting of individuals with Frontotemporal Dementia (FTD) may  
323 highlight neuropsychiatric symptoms and a language feature in the card instead of memory, as  
324 seen in our study.<sup>27,28</sup> This future development would also better inform primary care physicians  
325 which further tests to refer their patients to confirm their diagnosis, which will cut down some  
326 costs compared to sending the patients to all tests/procedures. Additionally, the demographic  
327 composition of the ADNI sample, predominantly White and highly educated individuals,  
328 highlights the need for further validation in more diverse populations to ensure the  
329 generalizability of our findings. Regarding the accessibility of the tests that were included in our  
330 scorecard, *APOE* genotyping is primarily used in research settings and is currently not included  
331 as a routine test in healthcare settings. Changes in healthcare policy are necessary to disseminate  
332 and implement the scorecard in clinical settings.

333           Our study lays the groundwork for a more accessible and population-wide approach to  
334 screening for Alzheimer's disease. As the field advances, the integration of emerging and readily  
335 available biomarkers, such as blood plasma tests, holds promise for enhancing the predictive  
336 accuracy of our scorecards. Recent advancements in blood plasma biomarkers for AD, such as  
337 the measurement of amyloid-beta and tau proteins, offer a non-invasive and cost-effective  
338 method for early detection, showing promising results in correlating with traditional  
339 neuroimaging and cerebrospinal fluid markers.<sup>29,30</sup> Moving forward, our next objective is to  
340 validate these scorecards using an independent dataset to assess their stability and  
341 generalizability across diverse populations. Additionally, we aim to collaborate with primary

## Scorecard to Predict Alzheimer's Disease

342 care physicians to collect both qualitative and quantitative data on the feasibility and potential  
343 impact of implementing these scorecards in routine clinical practice. This collaboration will  
344 provide valuable insights into the practical challenges and opportunities for integrating our tool  
345 into the healthcare system.

### 346 **Conclusion**

347 Our study generated a robust scoring system for predicting the likelihood of developing  
348 Alzheimer's disease using accessible and cost-efficient variables through interpretable machine  
349 learning. This framework's interpretability may aid primary care physicians in providing early  
350 detection to their patients, including those residing in resource-constrained areas.

351

352

353

354

355

356

357

358



## Scorecard to Predict Alzheimer's Disease

### 359 **Acknowledgments**

360 Data collection and sharing for this project was funded by the Alzheimer's Disease  
361 Neuroimaging Initiative (ADNI) (National Institutes of Health Grant U01 AG024904) and DOD  
362 ADNI (Department of Defense award number W81XWH-12-2-0012). ADNI is funded by the  
363 National Institute on Aging, the National Institute of Biomedical Imaging and Bioengineering,  
364 and through generous contributions from the following: AbbVie, Alzheimer's Association;  
365 Alzheimer's Drug Discovery Foundation; Araclon Biotech; BioClinica, Inc.; Biogen; Bristol-  
366 Myers Squibb Company; CereSpir, Inc.; Cogstate; Eisai Inc.; Elan Pharmaceuticals, Inc.; Eli  
367 Lilly and Company; EuroImmun; F. Hoffmann-La Roche Ltd and its affiliated company  
368 Genentech, Inc.; Fujirebio; GE Healthcare; IXICO Ltd.; Janssen Alzheimer Immunotherapy  
369 Research & Development, LLC.; Johnson & Johnson Pharmaceutical Research & Development  
370 LLC.; Lumosity; Lundbeck; Merck & Co., Inc.; Meso Scale Diagnostics, LLC.; NeuroRx  
371 Research; Neurotrack Technologies; Novartis Pharmaceuticals Corporation; Pfizer Inc.; Piramal  
372 Imaging; Servier; Takeda Pharmaceutical Company; and Transition Therapeutics. The Canadian  
373 Institutes of Health Research is providing funds to support ADNI clinical sites in Canada. Private  
374 sector contributions are facilitated by the Foundation for the National Institutes of Health  
375 ([www.fnih.org](http://www.fnih.org)). The grantee organization is the Northern California Institute for Research and  
376 Education, and the study is coordinated by the Alzheimer's Therapeutic Research Institute at the  
377 University of Southern California. ADNI data are disseminated by the Laboratory for Neuro  
378 Imaging at the University of Southern California.

### 379 **Funding**

380 The authors have no funding to report.

### 381 **Conflict of Interest**

## Scorecard to Predict Alzheimer's Disease

382 The authors have no conflict of interest to report.

### 383 **Datasets/Data Availability Statement**

384 Data used in the analysis were obtained from 722 the Alzheimer's Disease Neuroimaging

385 Initiative 723 (ADNI) database (<https://adni.loni.usc.edu/>)

## Scorecard to Predict Alzheimer's Disease

386

### References

- 387 1. Bradford A, Kunik ME, Schulz P, et al. Missed and Delayed Diagnosis of Dementia in  
388 Primary Care: Prevalence and Contributing Factors. *Alzheimer Disease & Associated*  
389 *Disorders* 2009; 23: 306.
- 390 2. Koch T, Iliffe S, the EVIDEM-ED project. Rapid appraisal of barriers to the diagnosis and  
391 management of patients with dementia in primary care: a systematic review. *BMC Family*  
392 *Practice* 2010; 11: 52.
- 393 3. Kumar Y, Koul A, Singla R, et al. Artificial intelligence in disease diagnosis: a systematic  
394 literature review, synthesizing framework and future research agenda. *J Ambient Intell*  
395 *Human Comput* 2023; 14: 8459–8486.
- 396 4. Helaly HA, Badawy M, Haikal AY. Deep Learning Approach for Early Detection of  
397 Alzheimer's Disease. *Cogn Comput* 2022; 14: 1711–1727.
- 398 5. Kavitha C, Mani V, Srividhya SR, et al. Early-Stage Alzheimer's Disease Prediction Using  
399 Machine Learning Models. *Front Public Health*; 10. Epub ahead of print 3 March 2022.  
400 DOI: 10.3389/fpubh.2022.853294.
- 401 6. LeCun Y, Bengio Y, Hinton G. Deep learning. *Nature* 2015; 521: 436–444.
- 402 7. Friedman JH. Greedy function approximation: A gradient boosting machine. *The Annals of*  
403 *Statistics* 2001; 29: 1189–1232.
- 404 8. Nasarian E, Alizadehsani R, Acharya UR, et al. Designing interpretable ML system to  
405 enhance trust in healthcare: A systematic review to proposed responsible clinician-AI-  
406 collaboration framework. *Information Fusion* 2024; 108: 102412.
- 407 9. Struck AF, Ustun B, Ruiz AR, et al. Association of an Electroencephalography-Based Risk  
408 Score With Seizure Probability in Hospitalized Patients. *JAMA Neurol* 2017; 74: 1419–  
409 1424.
- 410 10. Moreno RP, Metnitz PGH, Almeida E, et al. SAPS 3--From evaluation of the patient to  
411 evaluation of the intensive care unit. Part 2: Development of a prognostic model for  
412 hospital mortality at ICU admission. *Intensive Care Med* 2005; 31: 1345–1355.
- 413 11. Six AJ, Backus BE, Kelder JC. Chest pain in the emergency room: value of the HEART  
414 score. *Neth Heart J* 2008; 16: 191–196.
- 415 12. Than M, Flaws D, Sanders S, et al. Development and validation of the Emergency  
416 Department Assessment of Chest pain Score and 2 h accelerated diagnostic protocol. *Emerg*  
417 *Med Australas* 2014; 26: 34–44.
- 418 13. Liu J, Zhong C, Li B, et al. FasterRisk: Fast and Accurate Interpretable Risk Scores,  
419 <http://arxiv.org/abs/2210.05846> (2022, accessed 14 June 2024).

## Scorecard to Predict Alzheimer's Disease

- 420 14. Cabral C, Morgado PM, Campos Costa D, et al. Predicting conversion from MCI to AD  
421 with FDG-PET brain images at different prodromal stages. *Computers in Biology and*  
422 *Medicine* 2015; 58: 101–109.
- 423 15. García-Herranz S, Díaz-Mardomingo MC, Peraita H. Neuropsychological predictors of  
424 conversion to probable Alzheimer disease in elderly with mild cognitive impairment.  
425 *Journal of Neuropsychology* 2016; 10: 239–255.
- 426 16. Ustun B, Rudin C. Learning Optimized Risk Scores. *Journal of Machine Learning*  
427 *Research* 2019; 20: 1–75.
- 428 17. Gainotti G, Quaranta D, Vita MG, et al. Neuropsychological Predictors of Conversion from  
429 Mild Cognitive Impairment to Alzheimer's Disease. *Journal of Alzheimer's Disease* 2014;  
430 38: 481–495.
- 431 18. Li J-Q, Tan L, Wang H-F, et al. Risk factors for predicting progression from mild cognitive  
432 impairment to Alzheimer's disease: a systematic review and meta-analysis of cohort studies.  
433 *J Neurol Neurosurg Psychiatry* 2016; 87: 476–484.
- 434 19. Chen Y, Qian X, Zhang Y, et al. Prediction Models for Conversion From Mild Cognitive  
435 Impairment to Alzheimer's Disease: A Systematic Review and Meta-Analysis. *Front Aging*  
436 *Neurosci*; 14. Epub ahead of print 7 April 2022. DOI: 10.3389/fnagi.2022.840386.
- 437 20. Martorelli M, Sudo FK, Charchat-Fichman H. This is not only about memory: A systematic  
438 review on neuropsychological heterogeneity in Alzheimer's disease. *Psychology &*  
439 *Neuroscience* 2019; 12: 271–281.
- 440 21. Wilson RS, Leurgans SE, Boyle PA, et al. Cognitive Decline in Prodromal Alzheimer  
441 Disease and Mild Cognitive Impairment. *Archives of Neurology* 2011; 68: 351–356.
- 442 22. Ciesielska N, Sokołowski R, Mazur E, et al. Is the Montreal Cognitive Assessment (MoCA)  
443 test better suited than the Mini-Mental State Examination (MMSE) in mild cognitive  
444 impairment (MCI) detection among people aged over 60? Meta-analysis. *Psychiatr Pol*  
445 2016; 50: 1039–1052.
- 446 23. de Jager CA, Schrijnemaekers A-CMC, Honey TEM, et al. Detection of MCI in the clinic:  
447 evaluation of the sensitivity and specificity of a computerised test battery, the Hopkins  
448 Verbal Learning Test and the MMSE. *Age and Ageing* 2009; 38: 455–460.
- 449 24. Fraser KC, Meltzer JA, Rudzicz F. Linguistic Features Identify Alzheimer's Disease in  
450 Narrative Speech. *Journal of Alzheimer's Disease* 2016; 49: 407–422.
- 451 25. Ye J, Farnum M, Yang E, et al. Sparse learning and stability selection for predicting MCI to  
452 AD conversion using baseline ADNI data. *BMC Neurology* 2012; 12: 46.
- 453 26. Das D, Ito J, Kadowaki T, et al. An interpretable machine learning model for diagnosis of  
454 Alzheimer's disease. *PeerJ* 2019; 7: e6543.

## Scorecard to Predict Alzheimer's Disease

- 455 27. Johnson DK, Watts AS, Chapin BA, et al. Neuropsychiatric profiles in dementia. *Alzheimer*  
456 *Dis Assoc Disord* 2011; 25: 326–332.
- 457 28. Hutchinson AD, Mathias JL. Neuropsychological deficits in frontotemporal dementia and  
458 Alzheimer's disease: a meta-analytic review. *Journal of Neurology, Neurosurgery &*  
459 *Psychiatry* 2007; 78: 917–928.
- 460 29. Pereira JB, Janelidze S, Stomrud E, et al. Plasma markers predict changes in amyloid, tau,  
461 atrophy and cognition in non-demented subjects. *Brain* 2021; 144: 2826–2836.
- 462 30. Risacher SL, Fandos N, Romero J, et al. Plasma amyloid beta levels are associated with  
463 cerebral amyloid and tau deposition. *Alzheimer's & Dementia: Diagnosis, Assessment &*  
464 *Disease Monitoring* 2019; 11: 510–519.
- 465

Scorecard to Predict Alzheimer’s Disease

466 **Table 1.** Table of demographic and cognition data by diagnostic group

| Participants characteristics | Stable normal<br>( <i>n</i> = 177) | NC-AD<br>( <i>n</i> = 23) | Stable aMCI<br>( <i>n</i> = 232) | aMCI-AD<br>( <i>n</i> = 281) |
|------------------------------|------------------------------------|---------------------------|----------------------------------|------------------------------|
| Age (years)                  | 73.1 (6)*                          | 75.9 (4)*                 | 72.4 (7.5)**                     | 74.3 (6.9)**                 |
| Education (years)            | 16.6 (2.6)                         | 16 (2.8)                  | 16 (2.8)                         | 15.8 (2.8)                   |
|                              | <i>n</i> (%)                       | <i>n</i> (%)              | <i>n</i> (%)                     | <i>n</i> (%)                 |
| Female                       | 96 (54.2%)                         | 13 (56.5%)                | 94 (40.5%)                       | 115 (40.9%)                  |
| <i>APOE e4</i> non-carriers  | 135 (76.3%)                        | 12 (52.2 %)               | 142 (61.2 %)                     | 95 (33.8%)                   |
|                              | <i>M</i> ( <i>SD</i> )             | <i>M</i> ( <i>SD</i> )    | <i>M</i> ( <i>SD</i> )           | <i>M</i> ( <i>SD</i> )       |
| FAQ                          | 0.1 (0.4)**                        | 0.7 (2.8)**               | 1.5 (2.8)***                     | 5.2 (4.9)***                 |
| <b>Cognition</b>             |                                    |                           |                                  |                              |
| MMSE                         | 29.1 (1.1)                         | 29.5 (0.6)                | 28 (1.7)***                      | 27 (1.8)***                  |
| LDEL                         | 13.7 (3)                           | 13 (4.2)                  | 7 (3)***                         | 3.6 (3.1)***                 |
| TMT A                        | 32.2 (9.7)*                        | 37 (14.9)*                | 37.9 (16.1)***                   | 46.9 (24.4)***               |
| TMT B                        | 76.4 (35.9)                        | 89.5 (36.2)               | 95.5 (48.8)***                   | 139 (75.1)***                |
| RAVLT immediate              | 47.1 (9.6)                         | 44.3 (9.5)                | 37.8 (10.5)***                   | 28.8 (7.4)***                |
| RAVLT learning               | 6.4 (2.2)                          | 6 (2.6)                   | 4.8 (2.5)***                     | 3 (2.2)***                   |
| CATANIMSC                    | 21.2 (5.1)                         | 19.9 (5.3)                | 18.3 (5.1)***                    | 15.6 (4.8)***                |

NC-AD = Normal cognition to Alzheimer’s; aMCI = amnesic mild cognitive impairment; *APOE e4* = Apolipoprotein e4 allele; FAQ=Functional Activities Questionnaire; MMSE = Mini-Mental State Examination; LDEL = Logical Memory delayed recall; TMT = Trail Making Test; RAVLT = Rey Auditory Verbal Learning Test; CATANIMSC = Category Fluency (Animals); *M* = mean. *SD* = standard deviation.

Differences between stable normal vs. NC-AD or stable aMCI vs. aMCI-AD, \*  $p < 0.05$ , \*\* $p < 0.01$ , \*\*\* $p < 0.001$

FAQ and Cognition adjusted for age, education, and *APOE4*.

467

Scorecard to Predict Alzheimer’s Disease

468 **Table 2.** Scorecard with the highest AUC and Risk Score to assess AD development probability

| Variables                | Points    |       |
|--------------------------|-----------|-------|
| 1. Age <= 76.3           | -2 points | ...   |
| 2. <i>APOE4</i> <= 0     | -3 points | + ... |
| 3. RAVLT immediate <= 36 | 4 points  | + ... |
| 4. LDEL <= 3             | 5 points  | + ... |
| 5. FAQ <= 2              | -5 points | +     |
| <b>SCORE</b>             |           | =     |

469 *APOE4* = Apolipoprotein e4 allele; RAVLT = Rey Auditory Verbal Learning; LDEL = Logical  
 470 Memory delayed recall; Test; FAQ=Functional Activities Questionnaire

471

| Score    | -10 | -5   | -3   | -2   | 0    | 1    | 3    | 5    | 7    | 9    |
|----------|-----|------|------|------|------|------|------|------|------|------|
| Risk (%) | 4.3 | 23.7 | 40.4 | 50.0 | 68.5 | 76.3 | 87.5 | 93.8 | 97.1 | 98.6 |

472

## Scorecard to Predict Alzheimer’s Disease

473 **Figure 1.** Pipeline of conducting FasterRisk algorithm to generate the CAFE scorecard and its  
 474 clinical application.

475

476

477

478

479

480

481

482

483

484

### Scorecard Generation Pipeline

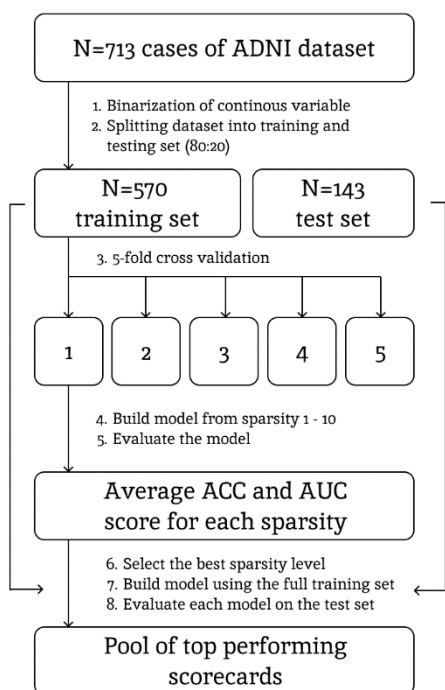

### Application of Scorecard for Diagnosis

| Variables                | Points    |
|--------------------------|-----------|
| 1. Age <= 76.3           | -2 points |
| 2. APOE4 <= 0            | -3 points |
| 3. RAVLT immediate <= 36 | 4 points  |
| 4. LDEL <= 3             | 5 points  |
| 5. FAQ <= 2              | -5 points |

| Score    | -10 | -5   | -3   | -2   | 0    | 1    | 3    | 5    | 7    | 9    |
|----------|-----|------|------|------|------|------|------|------|------|------|
| Risk (%) | 4.3 | 23.7 | 40.4 | 50.0 | 68.5 | 76.3 | 87.5 | 93.8 | 97.1 | 98.6 |

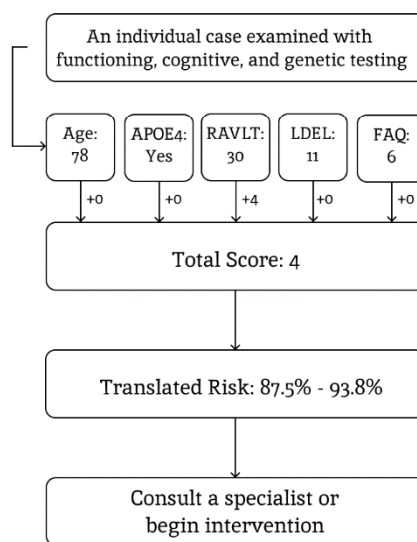

485

486

487

ACC = accuracy; AUC = area under the curve; APOE e4 = Apolipoprotein e4 allele; RAVLT =  
 Rey Auditory Verbal Learning Test; LDEL = Logical Memory delayed recall; FAQ=Functional  
 Activities Questionnaire



## Scorecard to Predict Alzheimer's Disease

488 **Figure 2.** Frequency of selected features in the 10 scorecards

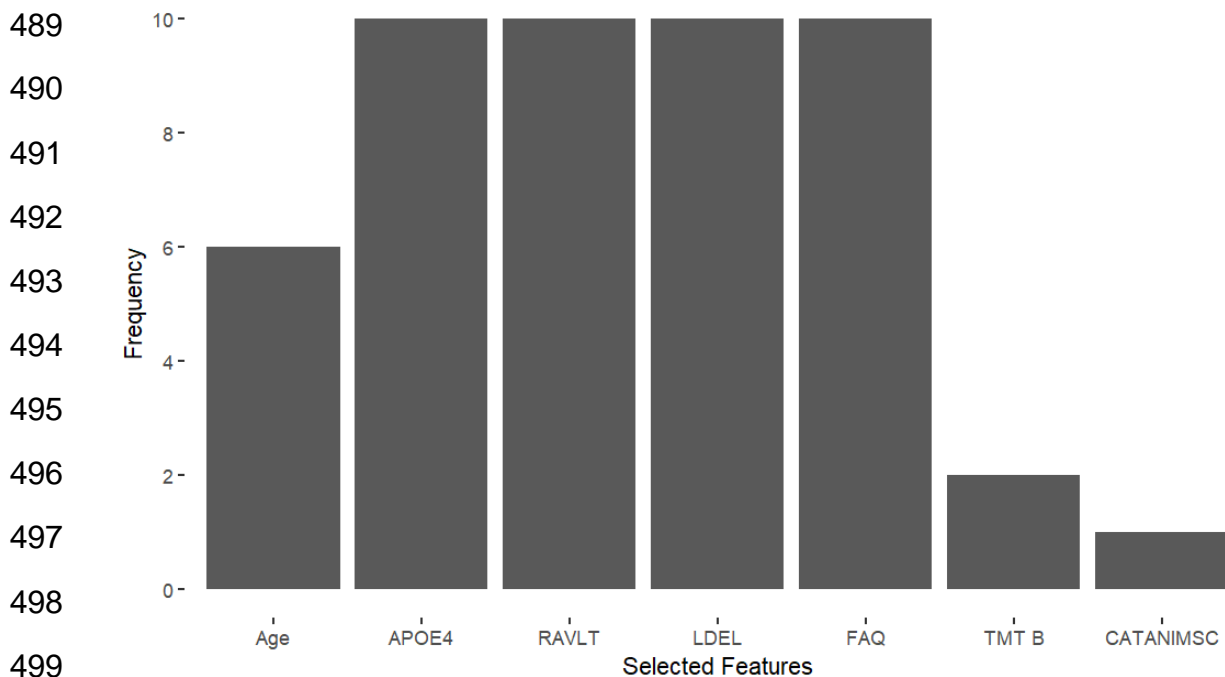

499  
500 *APOE e4* = Apolipoprotein e4 allele; RAVLT = Rey Auditory Verbal Learning Test; LDEL =  
501 Logical Memory delayed recall; FAQ=Functional Activities Questionnaire; TMT B= Trail  
502 Making Test B; CATANIMSC = Category Fluency (Animals)

### Scorecard Generation Pipeline

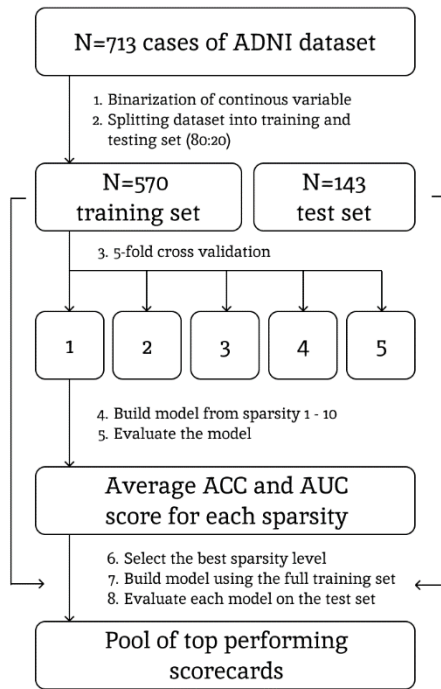

### Application of Scorecard for Diagnosis

| Variables                | Points    |
|--------------------------|-----------|
| 1. Age <= 76.3           | -2 points |
| 2. APOE4 <= 0            | -3 points |
| 3. RAVLT immediate <= 36 | 4 points  |
| 4. LDEL <= 3             | 5 points  |
| 5. FAQ <= 2              | -5 points |

| Score    | -10 | -5   | -3   | -2   | 0    | 1    | 3    | 5    | 7    | 9    |
|----------|-----|------|------|------|------|------|------|------|------|------|
| Risk (%) | 4.3 | 23.7 | 40.4 | 50.0 | 68.5 | 76.3 | 87.5 | 93.8 | 97.1 | 98.6 |

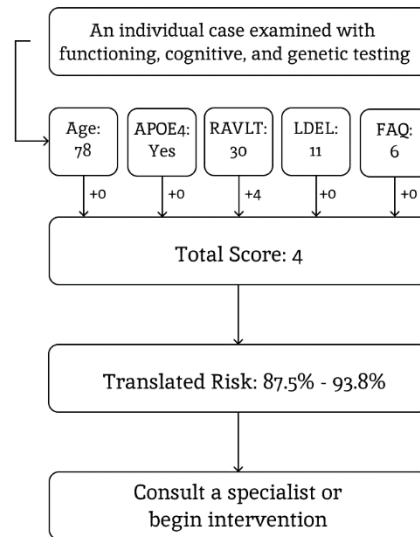

Frequency

10-  
8-  
6-  
4-  
2-  
0-

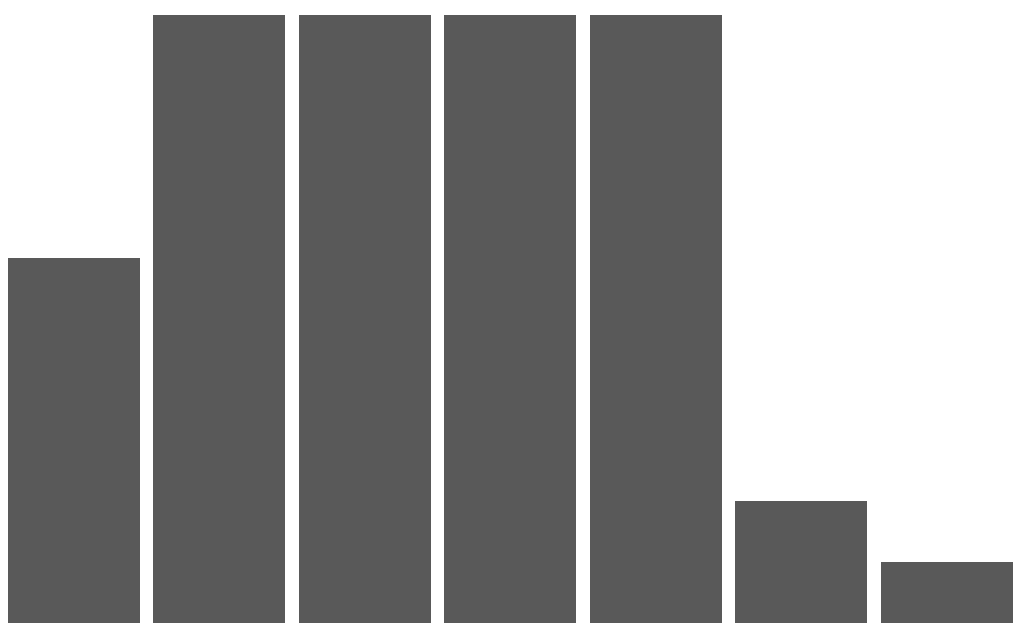

Age

APOE4

RAVLT

LDEL

FAQ

TMT B

CATANIMSC

Selected Features
